# Supplementary material for: Gut Microbiota Composition in Patients with Neurodegenerative Disorders (Parkinson’s and Alzheimer’s) and Healthy Controls: A Systematic Review
Source: MDPI journal article supplement (doi:10.3390/nu15204365), 2023-10-13
Supplement: s1 [file s1]

## Search Strategy:

Relevant and comprehensive biomedical research databases (PubMed, Medline, and Embase) were searched without language, date, or location restriction, following the Preferred Reporting Items for Systematic Reviews and Meta-analyses guideline (PRISMA) (Moher D, Shamseer L, Clarke M, Ghersi D, Liberati A, Petticrew M, Shekelle P, Stewart LA. Preferred reporting items for systematic review and meta-analysis protocols (PRISMA-P) 2015 statement. Systematic reviews. 2015 Dec;4(1):1-9.

## Search terms:

To retain the highest number of hits, the following search terms were selected in combination with different logical operators (AND, OR, (, " , \*): (((((((microbiome)) OR (microbiota)) OR (intestinal flora) OR (intestinal microbi\*) OR (dysbiosis) OR (gut microbi\*)) AND (Parkinson's Disease)) OR (Alzheimer's Disease)

Filter 1: Non-English manuscript

Filter 2: Non-Human studies

Filter 3: Reviews studies

**PubMed** > (<https://pubmed.ncbi.nlm.nih.gov/advanced/>)

**Embase** > (<https://ovidsp.dc2.ovid.com/ovid-a/ovidweb.cgi?ID=shib%3Aadc1%3A0x4f50f21f1be34bb29cdecbbbc99b6b86&PASSWORD=0x4f50f21f1be34bb29cdecbbbc99b6b86&CSC=Y&T=JS&D=emcz&NEWS=n&PAGE=main&entityID=https%3A%2F%2Fidp.unimelb.edu.au%2Fopenathens>)

**Medline** > (<https://ovidsp.dc2.ovid.com/ovid-a/ovidweb.cgi?ID=shib%3Aadc1%3A0xc98a08360f1a48b5b16c7db10917e639&PASSWORD=0xc98a08360f1a48b5b16c7db10917e639&CSC=Y&T=JS&D=ppez&NEWS=n&PAGE=main&entityID=https%3A%2F%2Fidp.unimelb.edu.au%2Fopenathens>)

## Search result:

| Searching Studies                | PubMed | Embase | Medline | Total  |
|----------------------------------|--------|--------|---------|--------|
| No Filter                        | 197715 | 6325   | 10002   | 214042 |
| Filter 1: Non-English manuscript | 188988 | 6160   | 9836    | 204984 |
| Filter 2: Non-Human studies      | 137833 | 4282   | 5141    | 147256 |
| Filter 3: Review studies         | 5079   | 203    | 2645    | 7927   |
| Filter 4: Full-text availability | 5016   | 24     | 587     | 5627   |
| Total before removing duplicates | 5627   |        |         |        |
| Number of duplicate studies      | 21     |        |         |        |
| Total after removing duplicates  | 5606   |        |         |        |

## Inclusion criteria:

- Human studies
- Studies comparing the gut microbiota composition between healthy individuals and Parkinson's or Alzheimer's patients.

- English articles
- Molecular-based approaches (including 16S rRNA sequencing or shotgun metagenomic studies)

**Exclusion criteria**

- Animal studies
- Studies without appropriate healthy and control groups
- Non-English articles
- Studies with inappropriate method used including culture-bases studies or targeted PCR
- Review papers
- Duplicates
