# Supplementary figures and images for: Gut Microbiota Composition in Patients with Neurodegenerative Disorders (Parkinson’s and Alzheimer’s) and Healthy Controls: A Systematic Review
Source: MDPI journal article supplement (doi:10.3390/nu15204365), 2023-10-13

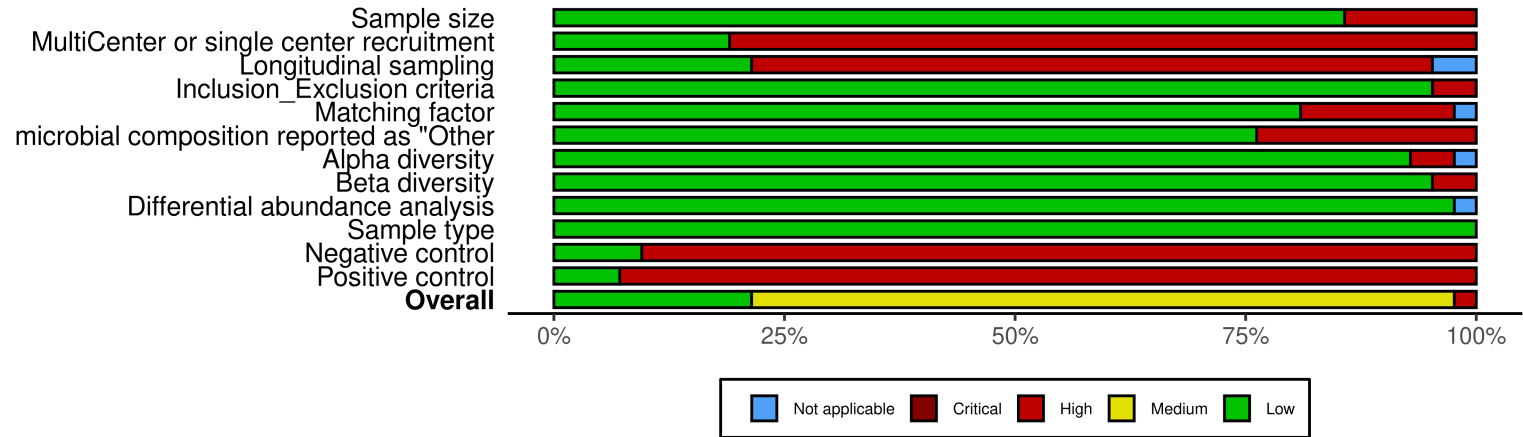

Supplement: s1 [file s1]
